# Supplementary material for: NF-kB Regulation and the Chaperone System Mediate Restorative Effects of the Probiotic Lactobacillus fermentum LF31 in the Small Intestine and Cerebellum of Mice with Ethanol-Induced Damage
Source: MDPI journal article supplement (doi:10.3390/biology12111394), 2023-11-01
Supplement: s1 [file s1]

# **NF- $\kappa$ B regulation and the chaperone system mediate restorative effects of the probiotic *Lactobacillus fermentum* LF31 in the small intestine and cerebellum of mice with ethanol-induced damage**

Letizia Paladino, Francesca Rappa, Rosario Barone, Filippo Macaluso, Francesco Paolo Zummo, Sabrina David, Marta Anna Szychlinska, Fabio Bucchieri, Everly Conway de Macario, Alberto J L Macario, Francesco Cappello, Antonella Marino Gammazza

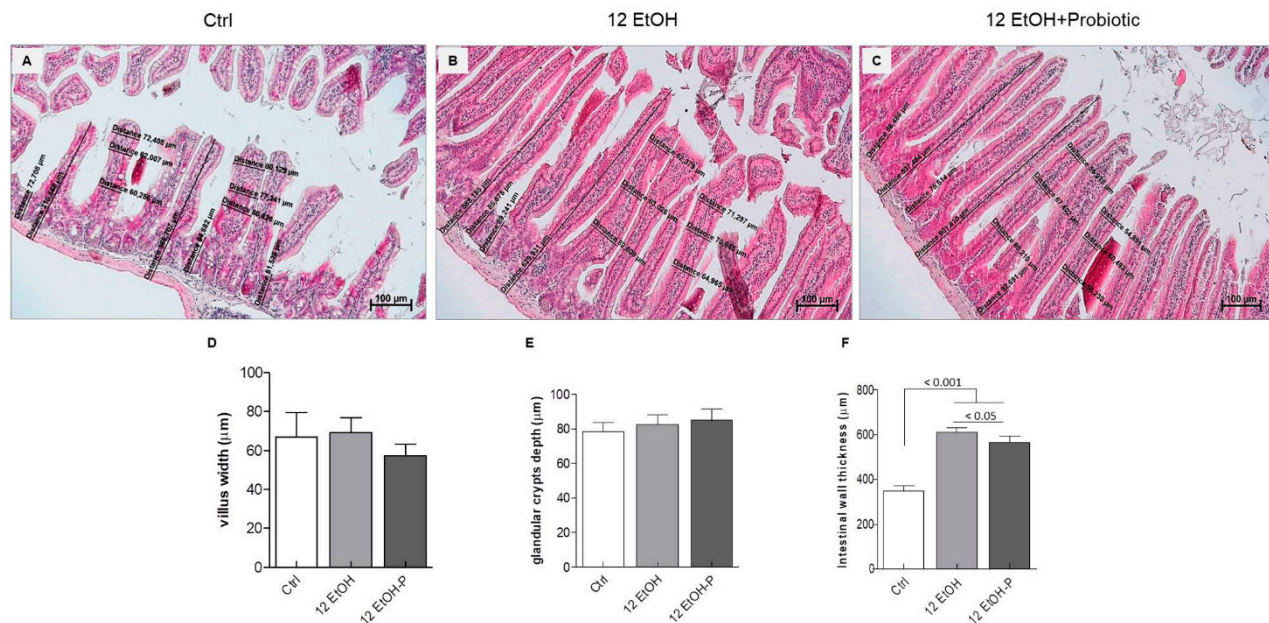

**Figure S1:** Small intestinal histomorphometry. The morphological analysis performed on the mucosa of the jejunum, stained with H&E, was conducted to evaluate the width of the intestinal villi, the depth of the glandular crypts, and the thickness of the entire intestinal wall of mice fed with a standard diet (Ctrl, **A**), ethanol (12 EtOH, **B**), and ethanol and *L. fermentum* LF31 diets (12 EtOH+Probiotic, **C**). The data obtained show no statistically significant differences in the evaluations of the width of the villi and the depth of the glandular crypts (**D** and **E**, respectively). On the other hand, the intestinal wall thickness, as a consequence of the difference in villus length, was significantly greater in the 12 EtOH and 12 EtOH+Probiotic groups than in the control group ( $p < 0.001$ ) and between the 12 EtOH and 12 EtOH+Probiotic groups ( $p < 0.05$ ) (**G**).
